# Supplementary material for: Patient Reported Burden of Asthma on Resource Use and Productivity Across 11 Countries in Europe
Source: Springer Nature journal article supplement (doi:10.1007/s12325-015-0204-6), 2015-04-01
Supplement: MOESM1 [file 9203484]

- The present study utilizes the previously published REcognise Asthma and Link to Symptoms and Experience (REALISE™) data (self-reported by respondents) to understand resource use and absenteeism in asthma patients across 11 countries in Europe.
- Resource utilization in terms of visits to primary healthcare professionals, i.e., general practitioner and nurse, and secondary healthcare professional, i.e., specialist, varied across countries.
- Utilization of healthcare resources, e.g., hospital, accident and emergency visits, and absence from work varied across countries.
- The differences in primary care and specialist visits use suggest a possible difference in healthcare delivery across countries.
- Overall, this study highlights the variability in the economic and societal impact that asthma has across different countries in Europe.

This summary slide represents the opinions of the authors. Sponsorship for this study and article processing charges were funded by Mundipharma International Limited (Cambridge, UK). We thank Emily Taylor, Incite Marketing Planning Limited (London, UK) for assistance in data analysis and Caoimhe McKerr (Adelphi Values, Bollington, UK) for editorial assistance. Support for this assistance was funded by Mundipharma International Limited. For a full list of acknowledgments and conflicts of interest for all authors of this article, please see the full text online. Copyright © The Author(s) 2015. Creative Commons Attribution Noncommercial License (CC BY-NC).
